# Supplementary material for: High Prevalence of Multidrug-Resistant Klebsiella pneumoniae in a Tertiary Care Hospital in Ethiopia
Source: MDPI journal article supplement (doi:10.3390/antibiotics10081007), 2021-08-20
Supplement: s1 [file s1]

| Level of Resistance | Resistance Pattern |   |   |   |   |   |   |   |   |   |   |   | Frequency |
|---------------------|--------------------|---|---|---|---|---|---|---|---|---|---|---|-----------|
|                     | A                  | B | C | D | E | F | G | H | I | J | K | L |           |
| R12                 |                    |   |   |   |   |   |   |   |   |   |   |   | 20        |
| R11                 |                    |   |   |   |   |   |   |   |   |   |   |   | 2         |
| R11                 |                    |   |   |   |   |   |   |   |   |   |   |   | 2         |
| R11                 |                    |   |   |   |   |   |   |   |   |   |   |   | 3         |
| R11                 |                    |   |   |   |   |   |   |   |   |   |   |   | 5         |
| R11                 |                    |   |   |   |   |   |   |   |   |   |   |   | 4         |
| R10                 |                    |   |   |   |   |   |   |   |   |   |   |   | 1         |
| R10                 |                    |   |   |   |   |   |   |   |   |   |   |   | 3         |
| R10                 |                    |   |   |   |   |   |   |   |   |   |   |   | 1         |
| R10                 |                    |   |   |   |   |   |   |   |   |   |   |   | 1         |
| R10                 |                    |   |   |   |   |   |   |   |   |   |   |   | 2         |
| R10                 |                    |   |   |   |   |   |   |   |   |   |   |   | 1         |
| R10                 |                    |   |   |   |   |   |   |   |   |   |   |   | 3         |
| R10                 |                    |   |   |   |   |   |   |   |   |   |   |   | 3         |
| R10                 |                    |   |   |   |   |   |   |   |   |   |   |   | 4         |
| R9                  |                    |   |   |   |   |   |   |   |   |   |   |   | 1         |
| R9                  |                    |   |   |   |   |   |   |   |   |   |   |   | 1         |
| R9                  |                    |   |   |   |   |   |   |   |   |   |   |   | 1         |
| R9                  |                    |   |   |   |   |   |   |   |   |   |   |   | 6         |
| R9                  |                    |   |   |   |   |   |   |   |   |   |   |   | 5         |
| R9                  |                    |   |   |   |   |   |   |   |   |   |   |   | 1         |
| R9                  |                    |   |   |   |   |   |   |   |   |   |   |   | 3         |
| R9                  |                    |   |   |   |   |   |   |   |   |   |   |   | 2         |
| R9                  |                    |   |   |   |   |   |   |   |   |   |   |   | 2         |
| R8                  |                    |   |   |   |   |   |   |   |   |   |   |   | 1         |
| R8                  |                    |   |   |   |   |   |   |   |   |   |   |   | 1         |
| R8                  |                    |   |   |   |   |   |   |   |   |   |   |   | 1         |
| R8                  |                    |   |   |   |   |   |   |   |   |   |   |   | 1         |

| Level of Resistance | Resistance Pattern |   |   |   |   |   |   |   |   |   |   |   | Frequency |
|---------------------|--------------------|---|---|---|---|---|---|---|---|---|---|---|-----------|
|                     | A                  | B | C | D | E | F | G | H | I | J | K | L |           |
| R8                  |                    |   |   |   |   |   |   |   |   |   |   |   | 1         |
| R8                  |                    |   |   |   |   |   |   |   |   |   |   |   | 2         |
| R8                  |                    |   |   |   |   |   |   |   |   |   |   |   | 5         |
| R8                  |                    |   |   |   |   |   |   |   |   |   |   |   | 2         |
| R8                  |                    |   |   |   |   |   |   |   |   |   |   |   | 8         |
| R7                  |                    |   |   |   |   |   |   |   |   |   |   |   | 1         |
| R7                  |                    |   |   |   |   |   |   |   |   |   |   |   | 1         |
| R7                  |                    |   |   |   |   |   |   |   |   |   |   |   | 1         |
| R7                  |                    |   |   |   |   |   |   |   |   |   |   |   | 1         |
| R7                  |                    |   |   |   |   |   |   |   |   |   |   |   | 1         |
| R7                  |                    |   |   |   |   |   |   |   |   |   |   |   | 1         |
| R7                  |                    |   |   |   |   |   |   |   |   |   |   |   | 2         |
| R7                  |                    |   |   |   |   |   |   |   |   |   |   |   | 1         |
| R7                  |                    |   |   |   |   |   |   |   |   |   |   |   | 3         |
| R6                  |                    |   |   |   |   |   |   |   |   |   |   |   | 1         |
| R6                  |                    |   |   |   |   |   |   |   |   |   |   |   | 1         |
| R6                  |                    |   |   |   |   |   |   |   |   |   |   |   | 1         |
| R6                  |                    |   |   |   |   |   |   |   |   |   |   |   | 2         |
| R6                  |                    |   |   |   |   |   |   |   |   |   |   |   | 1         |
| R6                  |                    |   |   |   |   |   |   |   |   |   |   |   | 3         |
| R6                  |                    |   |   |   |   |   |   |   |   |   |   |   | 1         |
| R5                  |                    |   |   |   |   |   |   |   |   |   |   |   | 5         |
| R5                  |                    |   |   |   |   |   |   |   |   |   |   |   | 1         |
| R5                  |                    |   |   |   |   |   |   |   |   |   |   |   | 1         |
| R5                  |                    |   |   |   |   |   |   |   |   |   |   |   | 1         |
| R3                  |                    |   |   |   |   |   |   |   |   |   |   |   | 1         |
| R2                  |                    |   |   |   |   |   |   |   |   |   |   |   | 1         |
| R1                  |                    |   |   |   |   |   |   |   |   |   |   |   | 1         |

The isolates were susceptible to all antimicrobial agents in each antimicrobial category

The isolates were non-susceptible to at least one antimicrobial agent in each antimicrobial category

**Figure S1.** Multidrug resistance patterns of *K. pneumoniae* isolates.

**Antimicrobial categories** based on Magiorakos *et al.* (2012): — **A:** Tetracyclines, **B:** Aminoglycosides, **C:** Fluoroquinolones, **D:** 1<sup>st</sup> and 2<sup>nd</sup> generation cephalosporins, **E:** Monobactams, **F:** Antipseudomonal penicillins +  $\beta$ -lactamase inhibitors, **G:** Penicillins +  $\beta$ -lactamase inhibitors, **H:** Folate pathway inhibitors, **I:** Phenicol, **J:** Cephamycins, **K:** 3<sup>rd</sup> and 4<sup>th</sup> generation cephalosporins, **L:** Carbapenems

## Antimicrobial Treatment History of Study Participants

In this study, data on the participant's history of antimicrobial treatment within the past 3 months were collected from their medical records. Based on this from the total study participants, 83 (62.9%) and 20 (15.2%) have taken 3<sup>rd</sup> or 4<sup>th</sup> generation cephalosporins and carbapenems, respectively.

**Table S1. Previous antimicrobial treatment status of study participants (*n* = 132)**

| Categories of Antimicrobials                                 | Yes <i>n</i> (%) | No <i>n</i> (%) |
|--------------------------------------------------------------|------------------|-----------------|
| Any Antimicrobial Treatment                                  | 116 (87.9)       | 16 (12.1)       |
| Carbapenems                                                  | 20 (15.2)        | 112 (84.8)      |
| 3 <sup>rd</sup> or 4 <sup>th</sup> Generation Cephalosporins | 83 (62.9)        | 49 (37.1)       |
| Quinolones                                                   | 14 (10.6)        | 118 (89.4)      |
| Aminoglycosides                                              | 43 (32.6)        | 89 (67.4)       |
